# Supplementary material for: Construction of a 3D multiple network skeleton by the thiol-Michael addition click reaction to fabricate novel polymer/graphene aerogels with exceptional thermal conductivity and mechanical properties
Source: Royal Society of Chemistry journal article supplement (doi:10.1039/c7ta07173f), 2017-01-01
Supplement: c7ta07173f1.pdf [file c7ta07173f1.pdf]

## **Supporting information**

# **Construction of 3D multiple networks skeleton by Thiol-Michael addition click reaction to fabricate novel polymer/graphene composite with exceptional thermal conductivity and mechanical properties**

Shiqiang Song,<sup>a</sup> Yong Zhang<sup>a, \*</sup>

<sup>a</sup> *School of Chemistry and Chemical Engineering, State Key Laboratory for Metal Matrix  
Composite Materials, Shanghai Jiao Tong University, Shanghai 200240, PR China*

\* Corresponding author: Prof. Yong Zhang

Email: yong\_zhang@sjtu.edu.cn

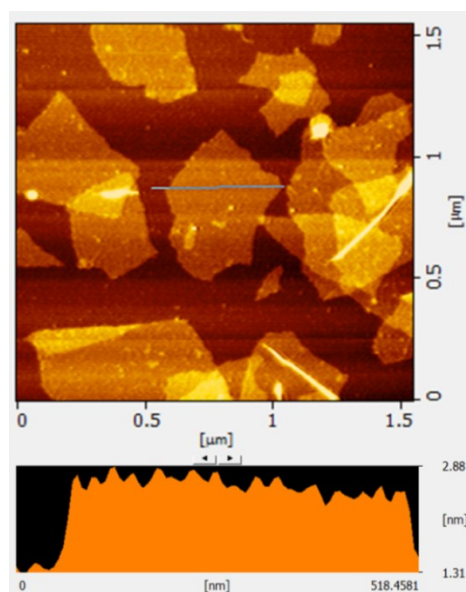

Fig.S1 AFM image of GO

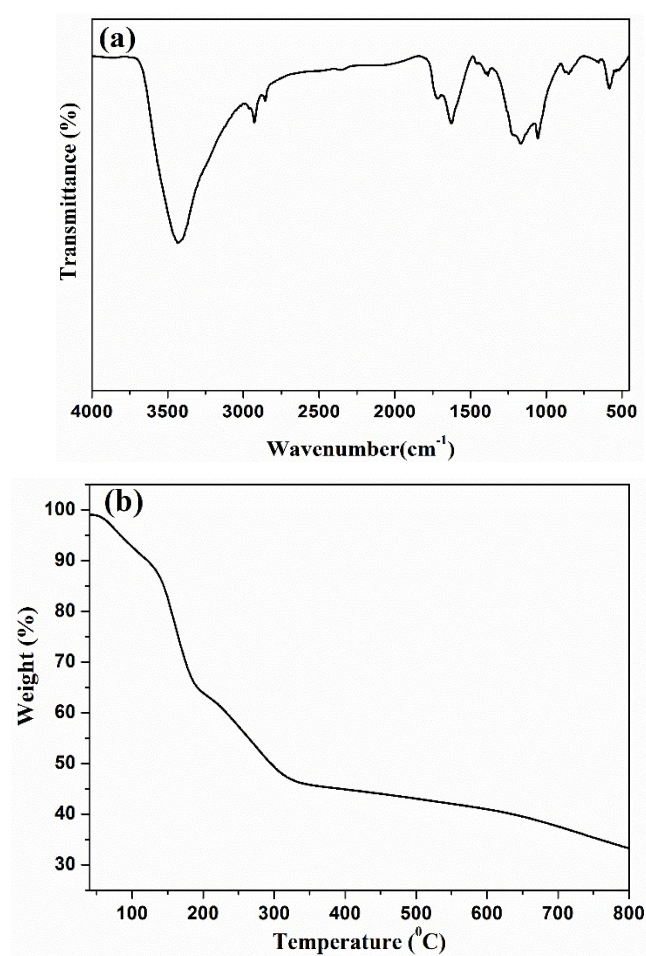

Fig.S2 FTIR spectrum of GO (a), and TGA curve of GO at 20  $^{\circ}\text{C}/\text{min}$  in a nitrogen atmosphere (b).

| <b>Samples</b> | <b>GO content (%)</b> | <b>Density (g/cm<sup>3</sup>)</b> | <b>BET surface Area<br/>(m<sup>2</sup>/g )</b> |
|----------------|-----------------------|-----------------------------------|------------------------------------------------|
| <b>PDG</b>     | 0                     | 1.14                              | --                                             |
| <b>PDGR0.5</b> | 0.5                   | 0.22                              | 10.9                                           |
| <b>PDGR1</b>   | 1                     | 0.14                              | 16.5                                           |
| <b>PDGR2</b>   | 2                     | 0.12                              | 34.6                                           |

Table S1. The components and properties of PDG and PDGR composites.

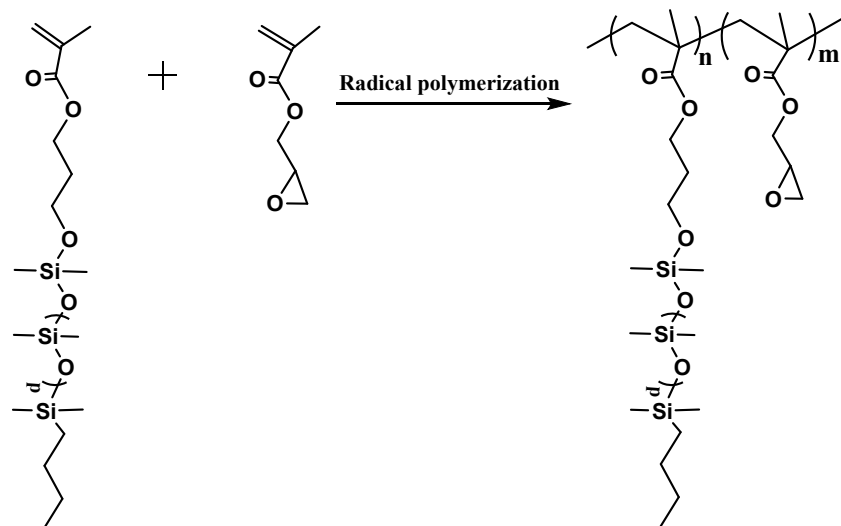

Fig.S3 Synthesis of PDMS-PGMA (random copolymer) by radical polymerization

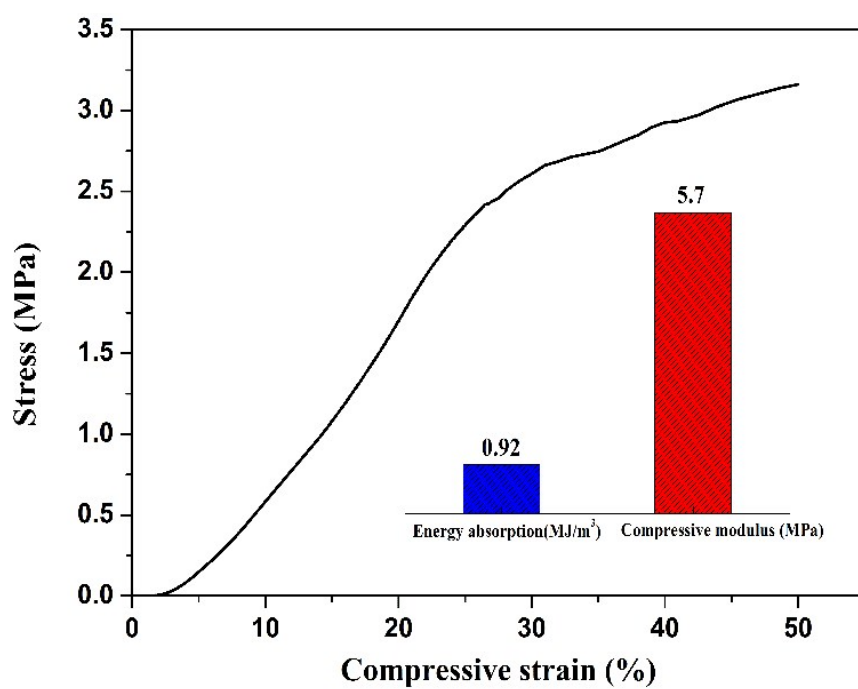

Fig.S4 Compressive stress-strain curve of PDG (inset: the compressive modulus and energy absorption of PDG).
